# Supplementary material
Source: publisher figshare collection journal article supplement (https://tandf.figshare.com/articles/dataset/_/10832981)

## Supplementary Information

### The purse-seine fishery for small pelagic fishes off the Madeira Archipelago

R Tejerina, M Hermida, G Faria and J Delgado

*African Journal of Marine Science* 2019, 41(4)

<https://doi.org/10.2989/1814232X.2019.1678520>

---

The model specification, results and diagnostic tests of generalised additive models (i.e. GAM plots) describing the influence of the amount of each species in the catch, the fishing location, depth and season on the amount of dead discards, slipping and total discards in the Madeiran purse-seine fishery over the 15-month period investigated. Landings of this fishery are mostly composed of blue jack mackerel *Trachurus picturatus*, Atlantic chub mackerel *Scomber colias*, and small amounts of sardine *Sardina pilchardus*.

```
# Dead discards
```

```
anova(newgam3)
```

Family: gaussian

Link function: identity

Formula:

```
logDD ~ s(logT.pic) + s(logS.col) + s(logS.pil) + Lat * Lon +  
      Depth + Season
```

Parametric Terms:

|         | df      | F      | p-value |
|---------|---------|--------|---------|
| Lat     | 1 5.824 | 0.0212 |         |
| Lon     | 1 5.926 | 0.0202 |         |
| Depth   | 1 2.433 | 0.1279 |         |
| Season  | 3 0.038 | 0.9900 |         |
| Lat:Lon | 1 5.936 | 0.0201 |         |

Approximate significance of smooth terms:

|             | edf   | Ref.df | F      | p-value  |
|-------------|-------|--------|--------|----------|
| s(logT.pic) | 3.189 | 3.863  | 1.419  | 0.29783  |
| s(logS.col) | 2.371 | 2.888  | 24.925 | 9.44e-10 |
| s(logS.pil) | 1.627 | 1.954  | 7.366  | 0.00465  |

```
plot.gam(newgam3)
```

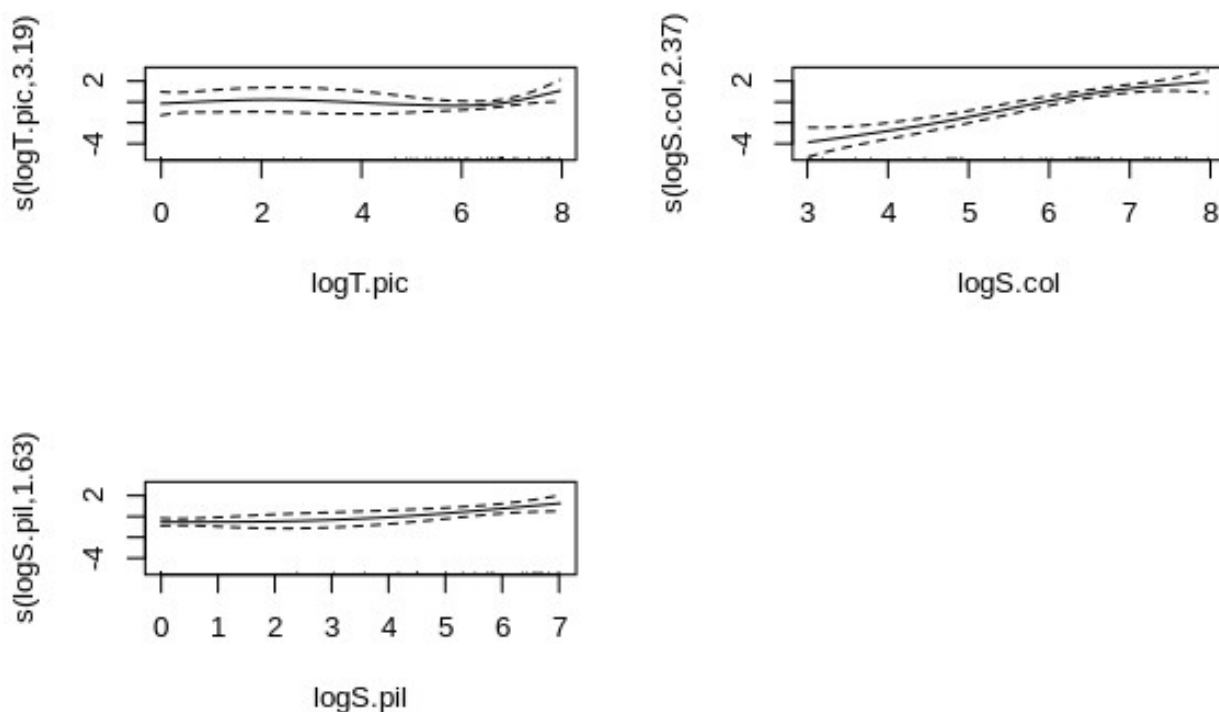

```
gam.check(newgam3)
```

Method: GCV Optimizer: magic

Smoothing parameter selection converged after 6 iterations.

The RMS GCV score gradient at convergence was 3.054356e-05 .

The Hessian was positive definite.

Model rank = 35 / 35

Basis dimension (k) checking results. Low p-value (k-index<1) may

indicate that  $k$  is too low, especially if  $\text{edf}$  is close to  $k'$ .

|                          | $k'$ | $\text{edf}$ | $k$ -index | p-value |
|--------------------------|------|--------------|------------|---------|
| <code>s(logT.pic)</code> | 9.00 | 3.19         | 1.11       | 0.76    |
| <code>s(logS.col)</code> | 9.00 | 2.37         | 1.28       | 0.97    |
| <code>s(logS.pil)</code> | 9.00 | 1.63         | 1.01       | 0.49    |

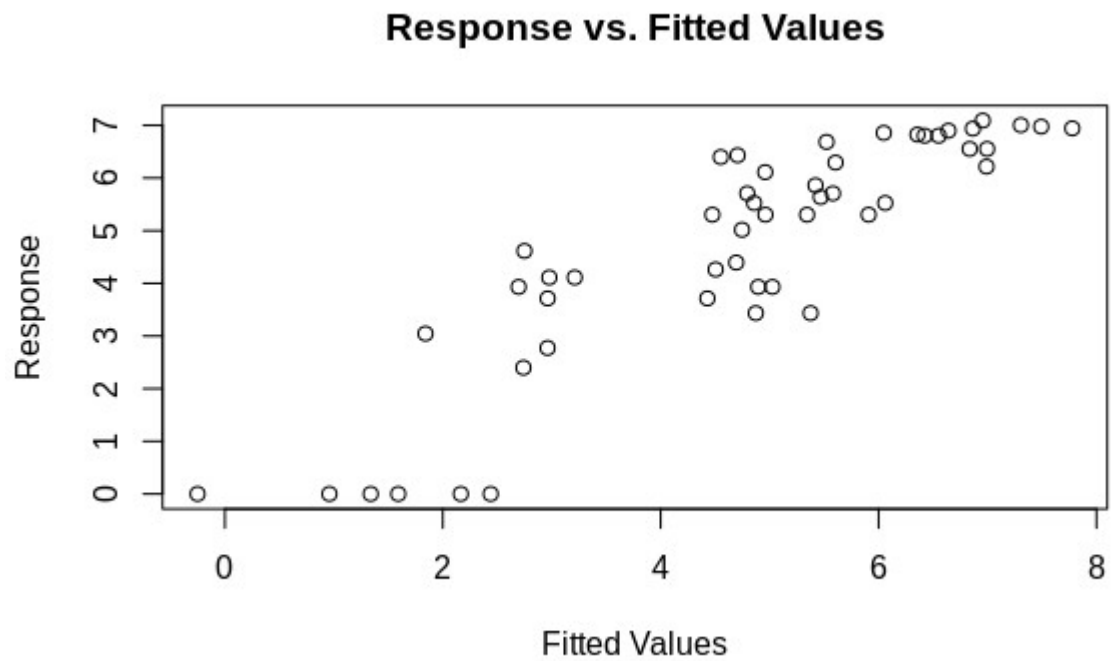

`qq.gam(newgam3)`

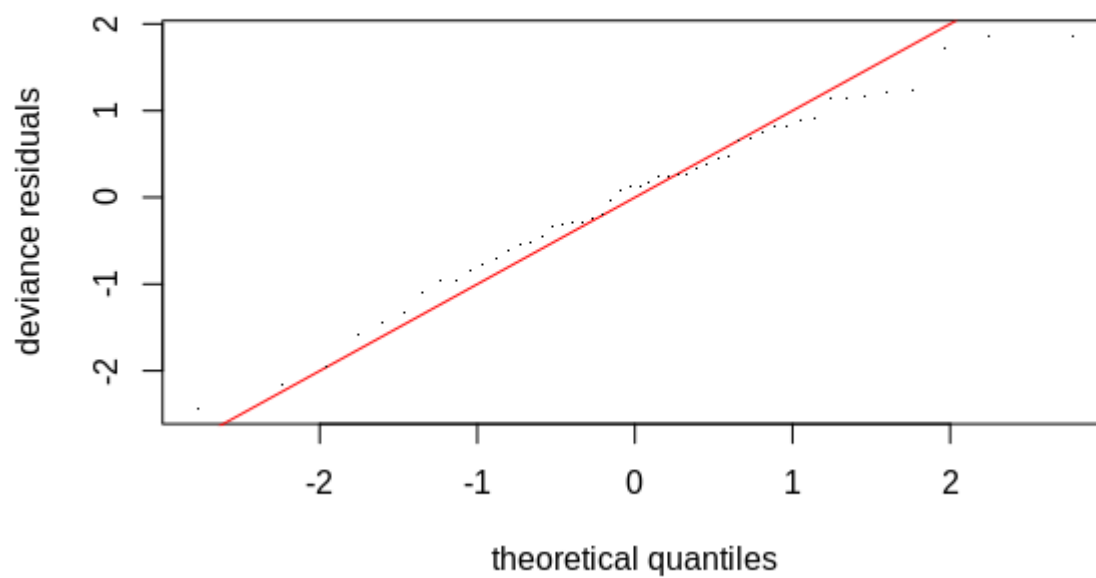

```
# Slipping
```

```
anova(newgam2)
```

Family: gaussian

Link function: identity

Formula:

```
logS ~ s(logT.pic) + s(logS.col) + s(logS.pil) + Lat * Lon +  
      Depth + Season
```

Parametric Terms:

|         | df      | F       | p-value |
|---------|---------|---------|---------|
| Lat     | 1 0.038 | 0.84750 |         |
| Lon     | 1 0.039 | 0.84443 |         |
| Depth   | 1 1.092 | 0.30348 |         |
| Season  | 3 5.581 | 0.00321 |         |
| Lat:Lon | 1 0.041 | 0.84108 |         |

Approximate significance of smooth terms:

|             | edf   | Ref.df | F      | p-value  |
|-------------|-------|--------|--------|----------|
| s(logT.pic) | 2.804 | 3.416  | 5.851  | 0.001941 |
| s(logS.col) | 3.384 | 4.102  | 10.682 | 4.89e-06 |
| s(logS.pil) | 2.116 | 2.498  | 8.053  | 0.000615 |

```
plot.gam(newgam2)
```

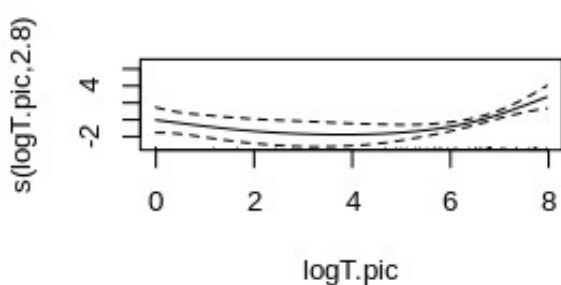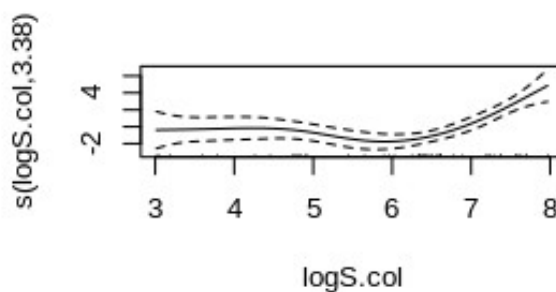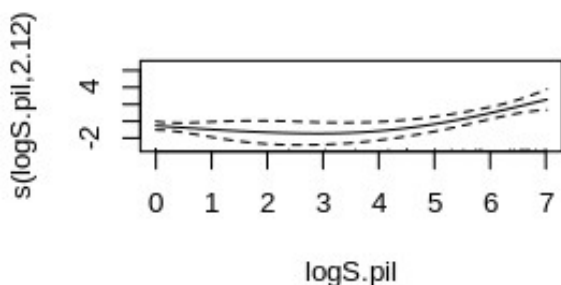

```
gam.check(newgam2)
```

Method: GCV Optimizer: magic

Smoothing parameter selection converged after 6 iterations.

The RMS GCV score gradient at convergence was 9.026201e-07 .

The Hessian was positive definite.

Model rank = 35 / 35

Basis dimension (k) checking results. Low p-value (k-index<1) may indicate that k is too low, especially if edf is close to k'.

|             | k'   | edf  | k-index | p-value |
|-------------|------|------|---------|---------|
| s(logT.pic) | 9.00 | 2.80 | 1.10    | 0.71    |
| s(logS.col) | 9.00 | 3.38 | 1.04    | 0.53    |
| s(logS.pil) | 9.00 | 2.12 | 1.19    | 0.88    |

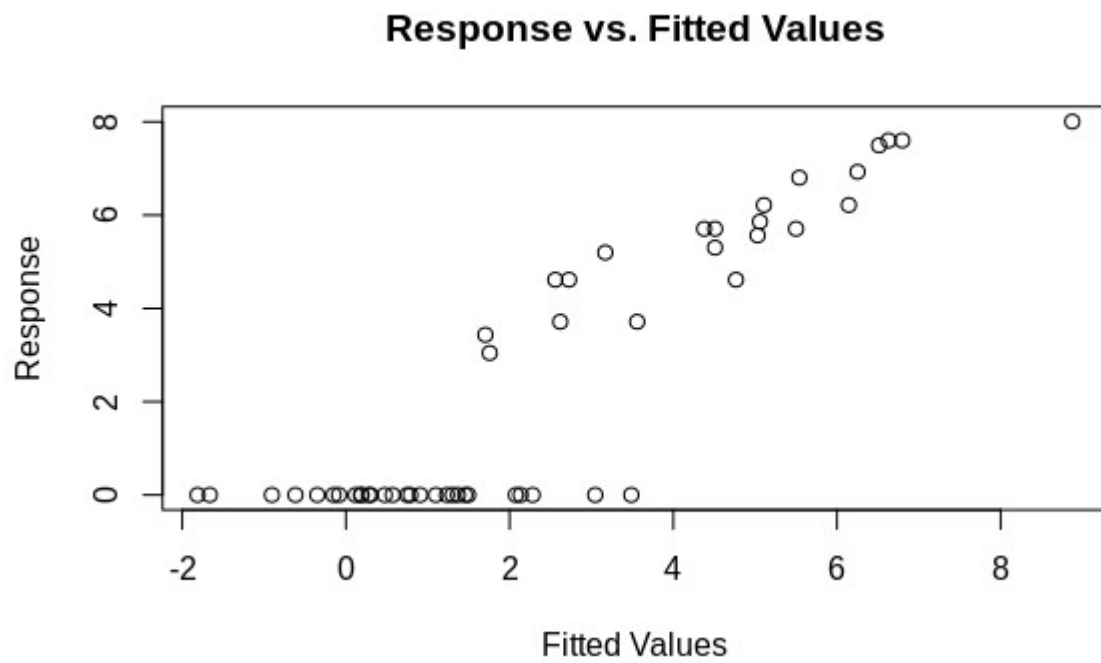

`qq.gam(newgam2)`

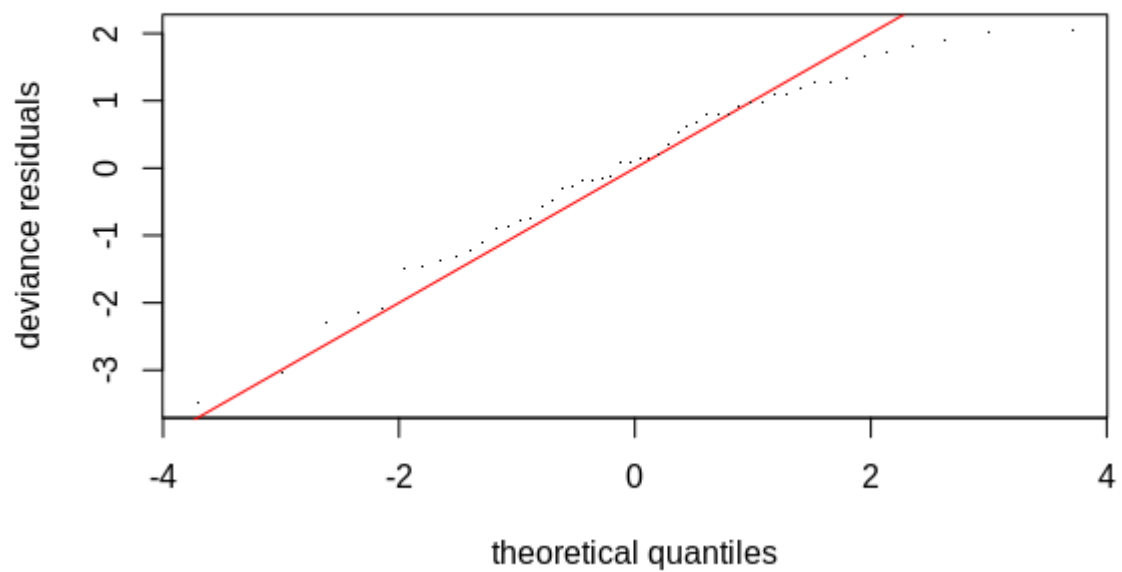

```
# Total discards
```

```
anova(newgam1)
```

Family: gaussian

Link function: identity

Formula:

```
logDiscards ~ s(logT.pic) + s(logS.col) + s(logS.pil) + Lat *  
              Lon + Depth + Season
```

Parametric Terms:

|         | df      | F      | p-value |
|---------|---------|--------|---------|
| Lat     | 1 3.100 | 0.0869 |         |
| Lon     | 1 3.201 | 0.0822 |         |
| Depth   | 1 3.833 | 0.0582 |         |
| Season  | 3 0.404 | 0.7509 |         |
| Lat:Lon | 1 3.203 | 0.0821 |         |

Approximate significance of smooth terms:

|             | edf   | Ref.df | F      | p-value  |
|-------------|-------|--------|--------|----------|
| s(logT.pic) | 4.064 | 4.863  | 3.303  | 0.0146   |
| s(logS.col) | 1.031 | 1.060  | 58.582 | 2.91e-10 |
| s(logS.pil) | 1.477 | 1.770  | 7.333  | 0.0106   |

```
plot.gam(newgam1)
```

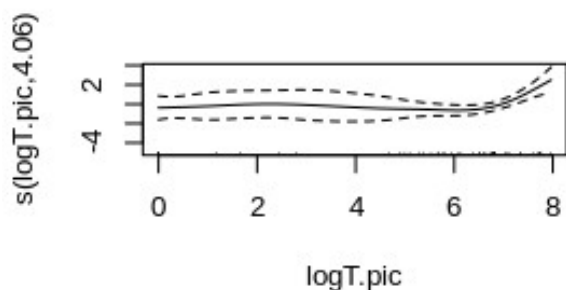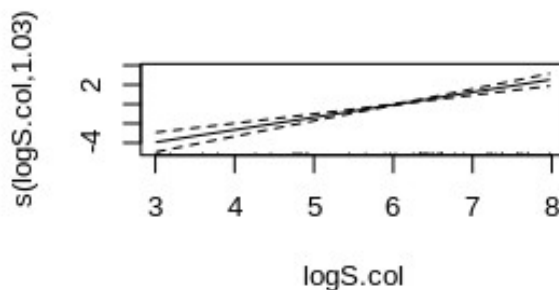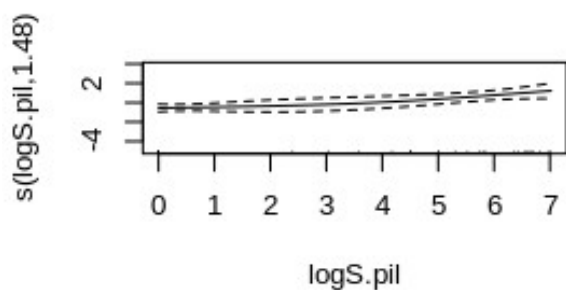

```
gam.check(newgam1)
```

Method: GCV Optimizer: magic

Smoothing parameter selection converged after 12 iterations.

The RMS GCV score gradient at convergence was 7.790831e-07 .

The Hessian was positive definite.

Model rank = 35 / 35

Basis dimension (k) checking results. Low p-value (k-index<1) may indicate that k is too low, especially if edf is close to k'.

|             | k'   | edf  | k-index | p-value |
|-------------|------|------|---------|---------|
| s(logT.pic) | 9.00 | 4.06 | 1.05    | 0.63    |
| s(logS.col) | 9.00 | 1.03 | 1.27    | 0.94    |
| s(logS.pil) | 9.00 | 1.48 | 1.03    | 0.54    |

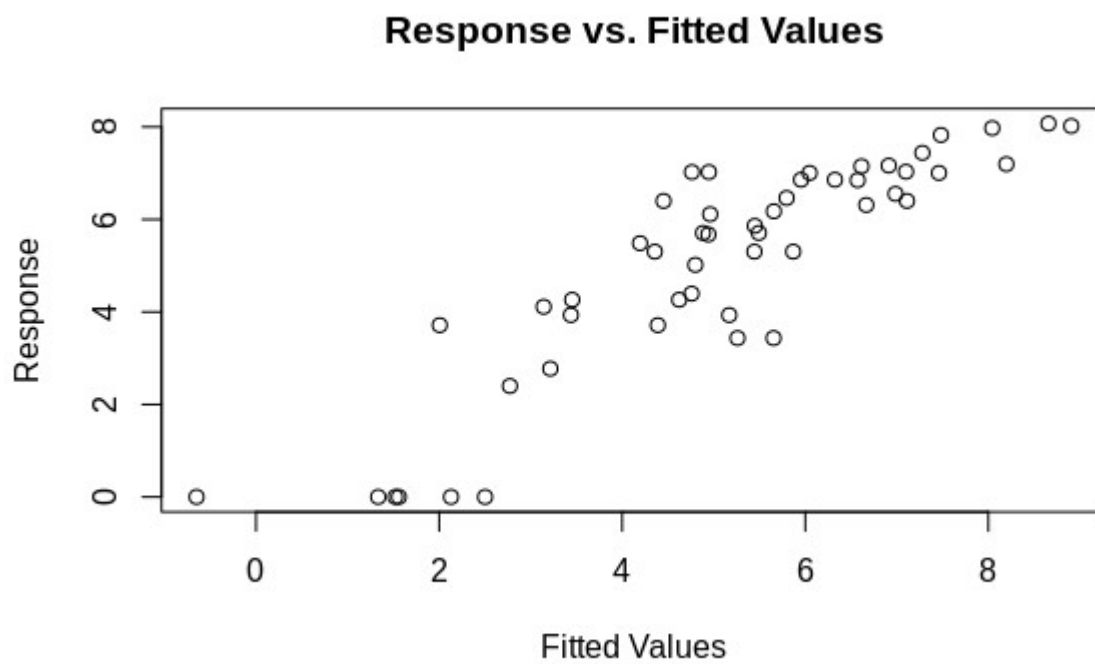

`qq.gam(newgam1)`

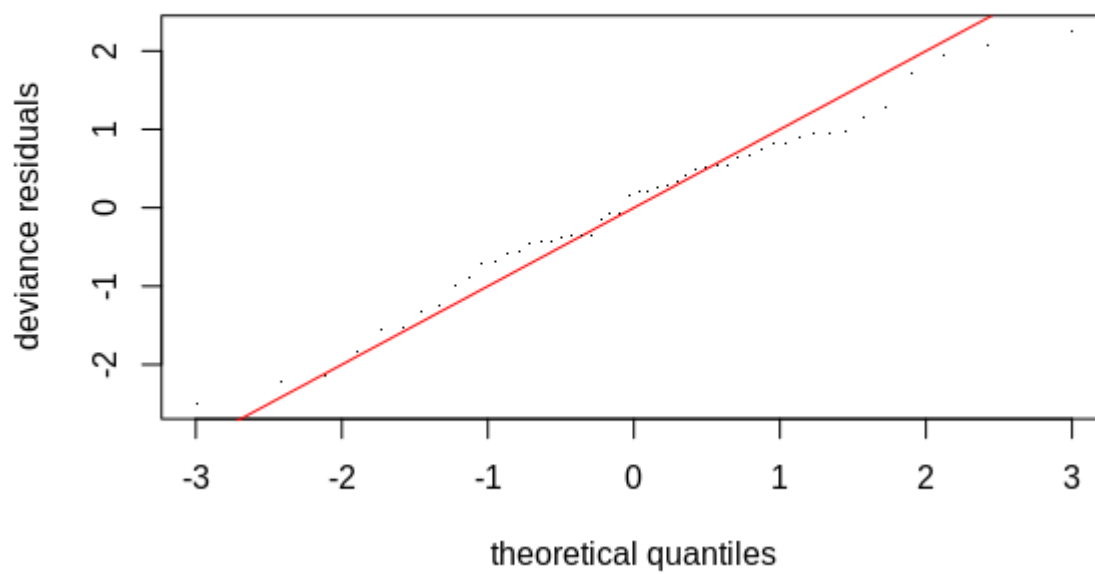

Supplement: Supplementary file 2 [file 2]
